# Supplementary material for: Association between alcohol consumption and incidence of type 2 diabetes in middle-aged Japanese: Panasonic cohort study 12
Source: Research Square preprint supplement (doi:10.21203/rs.3.rs-3887188/v1), 2024-01-30
Supplement: Supplementary file 1 [file ef3021f418acd77368d18db6.docx]

**supplementary Figure 1**

Adjusted hazard ratios of alcohol consumption for incidence of type 2 diabetes based on fasting plasma glucose category adjusted for age, sex, BMI, smoking status, and exercise habits.

**supplementary Figure 2**

Adjusted hazard ratios of alcohol consumption for incidence of type 2 diabetes according to sex adjusted for age, BMI, smoking status, and exercise habits.
